# Supplementary material for: Investigation of Genetic Causes in Patients with Congenital Heart Disease in Qatar: Findings from the Sidra Cardiac Registry
Source: MDPI journal article supplement (doi:10.3390/genes13081369), 2022-07-30
Supplement: s1 [file s1]

| Table S3 :Summary of the shared variants identified in 24 CHD patients through whole exome sequencing (WES) analysis |                                                                                    |                                     |          |        |                   |                |                |                   |                         |              |                                                                 |                            |                         |                             |                                                                                                                                 |                                          |            |
|----------------------------------------------------------------------------------------------------------------------|------------------------------------------------------------------------------------|-------------------------------------|----------|--------|-------------------|----------------|----------------|-------------------|-------------------------|--------------|-----------------------------------------------------------------|----------------------------|-------------------------|-----------------------------|---------------------------------------------------------------------------------------------------------------------------------|------------------------------------------|------------|
| Patient ID                                                                                                           | Cardiac Phenotype                                                                  | Extra Cardiac phenotype             | Age      | Gender | Country of origin | Gene           | Protein change | Nucleotide change | Gemini segregation      | Zygosity     | Inheritance                                                     | ClinVar                    | ACMG/AMP classification | ACMG/AMP Sub classification | Reported in other studies                                                                                                       | Reported cases country of origin         | References |
| Cardio-2.A                                                                                                           | TOF                                                                                | None                                | 6 months | F      | Qatar             | <i>TTN</i>     | p.Asn32797Ser  | c.98390A>G        | CH                      | Heterozygous | Paternal                                                        | Conflict interpretation    | Likely benign           | BP1, BP6, PP3               | Late onset progressive distal myopathy                                                                                          | European                                 | [1]        |
| Cardio-5.A                                                                                                           | ATS                                                                                | None                                | 2 months | M      | Yemen             | <i>SLC2A10</i> | p.Ser81Arg     | c.243C>G          | AR                      | Homozygous   | Both parents                                                    | Pathogenic                 | Likely pathogenic       | PM1,PM2,PP3,PP5             | ATS                                                                                                                             | Qatari, KSA                              | [2, 3]     |
| Cardio-11.A                                                                                                          | ASD                                                                                | Squint, polydactyly                 | 3 months | F      | India             | <i>PRR12</i>   | p.Gly1813Arg   | c.5437G>A         | AR                      | Homozygous   | Both parents                                                    | None                       | US                      | PM1,BP1                     | none                                                                                                                            | -                                        | -          |
| Cardio-12.A                                                                                                          | multiple CHD                                                                       | Failure to thrive                   | 20 days  | F      | Sri Lanka         | <i>KMT2D</i>   | p.Pro3665Ala   | c.10993C>G        | CH                      | Heterozygous | Maternal                                                        | Conflicting interpretation | US                      | BP1                         | Kabuki syndrome                                                                                                                 | Unknown                                  | [4]        |
| Cardio-15.A                                                                                                          | Shone's complex (hypoplastic transverse arch, VSD, PDA)                            | None                                | 7 days   | F      | Pakistan          | <i>FLT1</i>    | -              | c.1437-6delT      | <i>de novo</i>          | Heterozygous | None                                                            | None                       | none                    | -                           | none                                                                                                                            | -                                        | -          |
|                                                                                                                      |                                                                                    |                                     |          |        |                   | <i>CCDC141</i> | p.Val1457Ile   | -                 | AR                      | Homozygous   | Both parents                                                    | Likely Benign              | Likely benign           | BS1,BP6                     | Reported (unknown condition)                                                                                                    | -                                        | [4]        |
| Cardio-16.A                                                                                                          | TOF                                                                                | None                                | 9 months | M      | Sudan             | <i>SORBS2</i>  | p.Phe1188Leu   | c.3564C>A         | Could not be identified | Heterozygous | Not reported *                                                  | None                       | US                      | PM1                         | none                                                                                                                            | -                                        | -          |
|                                                                                                                      |                                                                                    |                                     |          |        |                   | <i>DYNC2H1</i> | p.Val1899Ile   | c.5695G>A         | CH                      | Heterozygous | Maternal                                                        | Conflicting interpretation | US                      | PM1,PM2                     | Short rib Thoracic dysplasia                                                                                                    | Multiple submitters(unknown ethnicities) | [5]        |
|                                                                                                                      |                                                                                    |                                     |          |        |                   | <i>BMP10</i>   | p.Thr200Ser    | c.599C>G          | <i>de novo</i>          | Heterozygous | None                                                            | None                       | US                      | PM1,BS1                     | none                                                                                                                            | -                                        | -          |
|                                                                                                                      |                                                                                    |                                     |          |        |                   | <i>KYNU</i>    | p.Thr25Met     | c.74C>T           | <i>de novo</i>          | Heterozygous | None                                                            | Benign                     | US                      | PM1,PM2,BP6                 | none                                                                                                                            | -                                        | -          |
|                                                                                                                      |                                                                                    |                                     |          |        |                   | <i>PLCD4</i>   | p.Val364Met    | c.1090G>A         | <i>de novo</i>          | Heterozygous | None                                                            | None                       | US                      | PM1,BP4                     | none                                                                                                                            | -                                        | -          |
|                                                                                                                      |                                                                                    |                                     |          |        |                   | <i>MLIP</i>    | p.Pro459Arg    | c.1376C>G         | <i>de novo</i>          | Heterozygous | None                                                            | None                       | US                      | PM1                         | none                                                                                                                            | -                                        | -          |
|                                                                                                                      |                                                                                    |                                     |          |        |                   | <i>PBX3</i>    | p.His401Gln    | c.1203T>A         | <i>de novo</i>          | Heterozygous | None                                                            | None                       | US                      | PM1,PM2                     | none                                                                                                                            | -                                        | -          |
| Cardio-18.A                                                                                                          | Aortic stenosis & insufficiency, mild LVH, frequent PACs                           | none                                | 18 years | M      | Qatari            | <i>CMYA5</i>   | p.Ser2012Phe   | c.6035C>T         | AR                      | Homozygous   | One copy was maternally inherited( all siblings are carriers)** | Benign                     | likely benign           | BS1,BP6                     | Reported (unknown condition)                                                                                                    | Unknown                                  | [6]        |
|                                                                                                                      |                                                                                    |                                     |          |        |                   | <i>CMYA5</i>   | p.Glu584Ala    | c.1751A>C         | AR                      | Homozygous   | One copy was maternally inherited( all siblings are carriers)** | Benign                     | likely benign           | PM1,PM2                     | Reported (unknown comnditon)                                                                                                    | Unknown                                  | [7]        |
| Cardio-27.A                                                                                                          | TOF                                                                                | Prolonged QT interval, hearing loss |          | F      | Yemen             | <i>CHD7</i>    | p.Arg2098*     | c.6292C>T         | <i>de novo</i>          | Heterozygous | none                                                            | Pathogenic                 | Pathogenic              | PVS1,PM2,PP3,PP5            | Immune deficiency, CHARGE syndrome                                                                                              | China                                    | [8, 9]     |
| Cardio-31.A                                                                                                          | HLH                                                                                | None                                | 6 years  | F      | Sudan             | <i>DNAH11</i>  | c.9946-7T>C    | -                 | AR                      | Homozygous   | One copy paternally inherited ***                               | None                       | None                    | PM2                         | none                                                                                                                            | -                                        | -          |
|                                                                                                                      |                                                                                    |                                     |          |        |                   | <i>DNAAF3</i>  | p.Val536Met    | c.1606G>A         | AR                      | Homozygous   | One copy paternally inherited ***                               | Benign/likely benign       | Likely Bening           | PM1,BS1,BP1,BP4,BP6         | Hypertrophic cardiomyopathy, Dilated Cardiomyopathy, Recessive, Familial restrictive cardiomyopathy, Primary ciliary dyskinesia | -                                        | -          |
|                                                                                                                      |                                                                                    |                                     |          |        |                   | <i>DNAAF3</i>  | p.Trp44Leu     | c.131G>T          | AR                      | Homozygous   | One copy paternally inherited ***                               | Benign                     | likely benign           | PM1,BS1,BP1,BP6             | Primary ciliary dyskinesia                                                                                                      | -                                        | -          |
|                                                                                                                      |                                                                                    |                                     |          |        |                   | <i>COL5A2</i>  | p.Arg956Pro    | c.2867G>C         | CH                      | Heterozygous | Paternal                                                        | Benign                     | Likely benign           | PM1,BS1,BP6                 | Ehler Danlos Syndrome, cardiovascular phenotype                                                                                 | Unknown                                  | [10]       |
|                                                                                                                      |                                                                                    |                                     |          |        |                   | <i>SMYD4</i>   | p.Tyr295Cys    | c.884A>G          | AR                      | Homozygous   | One copy paternally inherited ***                               | None                       | US                      | PM1                         | none                                                                                                                            | -                                        | -          |
| Cardio-36.A                                                                                                          | TOF                                                                                | None                                | 5 months | F      | Sudan             | <i>IFT172</i>  | p.Val1204Leu   | c.3610G>C         | CH                      | heterozygous | Maternal                                                        | Benign /likely benign      | US                      | BP6                         | Retinitis pigmentosa 71,Short-rib thoracic dysplasia 10 with or without polydactyly                                             | Unknown                                  | [11]       |
|                                                                                                                      |                                                                                    |                                     |          |        |                   | <i>IFT172</i>  | p.Arg1134Leu   | c.3401G>T         | CH                      | Heterozygous | Paternal                                                        | Benign/likely benign       | Likely benign           | BS1,BP6                     | Retinitis pigmentosa 71,Short-rib thoracic dysplasia 10 with or without polydactyly                                             | Unknown                                  | [11]       |
|                                                                                                                      |                                                                                    |                                     |          |        |                   | <i>SLC24A4</i> | p.Gln22His     | c.66A>T           | CH                      | Heterozygous | Paternal                                                        | None                       | US                      | PM1,PM2                     | none                                                                                                                            | -                                        | -          |
|                                                                                                                      |                                                                                    |                                     |          |        |                   | <i>ATP10D</i>  | p.Arg266His    | c.797G>A          | AD                      | Heterozygous | Maternal(brother is also carrier)                               | None                       | US                      | PM1,PM3                     | none                                                                                                                            | -                                        | -          |
|                                                                                                                      |                                                                                    |                                     |          |        |                   | <i>CDH20</i>   | p.Gln371Arg    | c.1112A>G         | AR                      | homozygous   | Both parents                                                    | None                       | US                      | PM1,BS1                     | none                                                                                                                            | -                                        | -          |
|                                                                                                                      |                                                                                    |                                     |          |        |                   | <i>PLEC</i>    | p.Ala1545Val   | c.4634C>T         | CH                      | Heterozygous | Maternal                                                        | Benign                     | US                      | PM1,PM2                     | Limb-girdle muscular dystrophy, type 2Q.Epidermolysis bullosa simplex with muscular dystrophy                                   | Unknown                                  | [12]       |
| Cardio-38.A                                                                                                          | Poly Valvular disease, Mitral valve prolapse                                       | None                                | 11 years | M      | Qatar             | <i>LRRC56</i>  | p.Pro305His    | c.914C>A          | Could not be identified | Heterozygous | Not reported *                                                  | None                       | US                      | -                           | none                                                                                                                            | -                                        | -          |
| cardio-40.A                                                                                                          | Tricuspid Atresia, restrictive VSD, Large PDA                                      | None                                | 5 months | F      | India             | <i>DNAH9</i>   | p.Arg1517Gln   | c.4550G>A         | CH                      | Heterozygous | Maternal                                                        | None                       | US                      | PM1                         | Crisponi/CISS1-like and Bohring-Opitz like syndrome                                                                             | Turkish                                  | [13]       |
|                                                                                                                      |                                                                                    |                                     |          |        |                   | <i>SAALI</i>   | p.Pro95Leu     | c.284C>T          | CH                      | Heterozygous | Paternal                                                        | None                       | US                      | PM1                         | none                                                                                                                            | -                                        | -          |
| Cardio-41.A                                                                                                          | Fontan,Right isomerism,Interrupted IVC, mitral atresis, DORV, Large VSD, severe PS | None                                | 16 years | F      | Yemen             | <i>DYNC2H1</i> | p.Leu592Phe    | c.1774C>T         | AD                      | Heterozygous | Maternal                                                        | Uncertain significant      | US                      | PM2,PP3                     | Intellectual disability, Jeune thoracic dystrophy, Short-rib thoracic dysplasia 3 with or without polydactyly                   | Unknown                                  | [14]       |
| Cardio-42.A                                                                                                          | TOF                                                                                | None                                | 6 months | M      | Kuwait            | <i>DNAH5</i>   | p.Asn1420Asp   | c.4258A>G         | CH                      | Heterozygous | Paternal                                                        | VUS                        | US                      | PM1,PM2                     | Primary ciliary dyskinesia                                                                                                      | Unknown                                  | [15]       |

|             |           |      |          |   |          |                |              |           |     |              |              |                                              |    |                    |                                                                                                                       |         |      |
|-------------|-----------|------|----------|---|----------|----------------|--------------|-----------|-----|--------------|--------------|----------------------------------------------|----|--------------------|-----------------------------------------------------------------------------------------------------------------------|---------|------|
| Cardio-47.A | TGA       | None | 15 days  | M | Egypt    | <i>INPP5F</i>  | p.Leu131Met  | c.391C>A  | CH  | Heterozygous | Paternal     | None                                         | US | PM1,PM2            | None                                                                                                                  | -       | -    |
| Cardio-48.A | HLH       | None | 20 days  | F | Pakistan | <i>SHROOM3</i> | p.Gln1623Lys | c.4867C>A | AR  | Homozygous   | Both parents | None                                         | US | PM1                | None                                                                                                                  | -       | -    |
|             |           |      |          |   |          | <i>SCN10A</i>  | p.Ser470Tyr  | c.1409C>A | CH  | Heterozygous | Maternal     | None                                         | US | BP4, BP1, BS1, PP3 | None                                                                                                                  | -       | -    |
|             |           |      |          |   |          | <i>PDE4DIP</i> | p.Gly1542Arg | c.4624G>A | CH  | Heterozygous | Paternal     | Likely benign                                | US | PM2                | None                                                                                                                  | -       | -    |
| Cardio-49.A | DILV, TGA | None | 22 days  | F | Pakistan | <i>NUP210</i>  | p.Pro1742Arg | c.5225C>G | CH  | Heterozygous | Maternal     | None                                         | US | PM2                | None                                                                                                                  | -       | -    |
|             |           |      |          |   |          | <i>COL6A2</i>  | p.Arg784His  | c.2351G>A | CH  | Heterozygous | Maternal     | Benign /likely benign                        | US | PM1,PM2,BP6        | None                                                                                                                  | -       | -    |
| Cardio-50.A | TOF       | None | 4 months | M | India    | <i>GLA</i>     | p.Asp313Tyr  | c.937G>T  | UPD | Homozygous   | Maternal     | Conflicting interpretations of pathogenicity | US | BP6, PP3           | Hypertrophic cardiomyopathy, Fabry disease, Angiokeratoma corporis diffusum,sudden unexplained death, cardiac variant | Unknown | [16] |
| Cardio-53.A | COA       | None | 3 months | M | Morocco  | <i>KARS</i>    | p.Glu120Gln  | c.358G>C  | CH  | Heterozygous | Maternal     | None                                         | US | PM1,PM2            | None                                                                                                                  | -       | -    |
|             |           |      |          |   |          | <i>PLEC</i>    | p.Gln2111His | c.6333G>C | CH  | Heterozygous | Maternal     | None                                         | US | PM1,PM2,PP3        | none                                                                                                                  | -       | -    |
|             |           |      |          |   |          | <i>ANKS6</i>   | p.Pro736Ala  | c.2206C>G | CH  | Heterozygous | Maternal     | None                                         | US | PM1,PM2,PP3,BP6    | None                                                                                                                  | -       | -    |

-Abbreviations:

TOF: tetralogy of Fallot, CHD: congenital cardiac defects.: HLH: hypoplastic left heart syndrome, ASD: atrial septal defect, ATSL arterial tortuosity syndrome, VSD: ventricular septal defect, PDA: patent ductus arteriousus,TAPVD: total anomalous pulmonary venous defect,DORV: double outlet right ventricle,TGA: transposition of great artery,DILV: double inlet left ventricle,COA: cortication of aorta F: female, M: Male, XLR: X-linked recessive, CH: compound heterozygous , AD: Autosomal dominant, AR: autosomal recessive,US: uncertain significance, UPD: uniparental disomy.

-ACMG/AMP sub-classification:

PM1: Located in a mutational hot spot and/or critical and well-established functional domain (e.g. active site of an enzyme) without benign variation

PM2: Absent from controls (or at extremely low frequency if recessive  in Exome Sequencing Project, 1000 Genomes or ExAC

PM5: Novel missense change at an amino acid residue where a different missense change determined to be pathogenic has been seen before

BS1: Allele frequency is greater than expected for disorder

BP1: Missense variant in a gene for which primarily truncating variants are known to cause disease

BP4: Multiple lines of computational evidence suggest no impact on gene or gene product (conservation, evolutionary, splicing impact, etc)

BP6: Reputable source recently reports variant as benign but the evidence is not available to the laboratory to perform an independent evaluation

PVS1: Null variant (nonsense, frameshift, canonical +/-1 or 2 splice sites, initiation codon, single or multi-exon deletion) in a gene where loss of function (LOF) is a known mechanism of disease

PS2: *De novo* (both maternity and paternity confirmed) in a patient with the disease and no family history

PP2: Missense variant in a gene that has a low rate of benign missense variation and where missense variants are a common mechanism of disease

PP3: Multiple lines of computational evidence support a deleterious effect on the gene or gene product (conservation, evolutionary, splicing impact, etc)

PP5: Reputable source recently reports variant as pathogenic but the evidence is not available to the laboratory to perform an independent evaluation

\*: number of enrolled family member is not enough to identify the source of the variant.

\*\*: father was not enrolled, could not identify the source of the other variant copy.

\*\*\*: Mother was not enrolled, could not identify the source of the other variant copy.

## References

- Savarese, Marco, Lorenzo Maggi, Anna Vihola, Per Harald Jonson, Giorgio Tasca, Lucia Ruggiero, Luca Bello, Francesca Magri, Teresa Giugliano, and Annalaura Torella. "Interpreting Genetic Variants in Titin in Patients with Muscle Disorders." *JAMA Neurol.* 75, no. 5 (2018): 557-65.
- Faiyaz-Ui-Haque, M, SHE Zaidi, AA Wahab, A Eltohami, MS Al-Mureikhi, G Al-Thani, VD Peltekova, L-C Tsui, and AS Teebi. "Identification of a P. Ser81arg Encoding Mutation in Slc2a10 Gene of Arterial Tortuosity Syndrome Patients from 10 Qatari Families." *Clin. Genet.* 74, no. 2 (2008): 189-93.
- Faiyaz-Ui-Haque, Muhammad, Syed HE Zaidi, Nouriyah Al-Sanna, Abdulrahman Alsward, Tariq Momenah, Namik Kaya, Fouad Al-Dayel, Issam Bouhoaigah, Mohammed Saliem, and Lap-Chee Tsui. "A Novel Missense and a Recurrent Mutation in Slc2a10 Gene of Patients Affected with Arterial Tortuosity Syndrome." *Atherosclerosis* 203, no. 2 (2009): 466-71.
- [VCV000773847.2], National Center for Biotechnology Information. <https://www.ncbi.nlm.nih.gov/clinvar/variation/VCV000773847.2> (
- National Center for Biotechnology Information. . "[Vcv000167010.9]." ClinVar, <https://www.ncbi.nlm.nih.gov/clinvar/variation/VCV000167010.9> (
- [VCV000722668.2], National Center for Biotechnology Information. ClinVar, <https://www.ncbi.nlm.nih.gov/clinvar/variation/VCV000722668.2> (
- Information, National Center for Biotechnology. "Clinvar; [Vcv000722667.2]." <https://www.ncbi.nlm.nih.gov/clinvar/variation/VCV000722667.2> (
- Zhu, Tianwen, Xiaohui Gong, Fei Bei, Li Ma, Jingjing Sun, Jian Wang, Gang Qiu, Jianhua Sun, Yu Sun, and Yongjun Zhang. "Primary Immunodeficiency-Related Genes in Neonatal Intensive Care Unit Patients with Various Genetic Immune Abnormalities: A Multicentre Study in China." *Clin. Transl. Immunol* 10, no. 3 (2021): e1266.
- Sun, Yifan, Jingjing Sun, Na Li, Cheng Cai, Xiaohui Gong, and Li Ma. "Phenotypic Spectrum of Typical Charge Syndrome in a Chinese Male Neonate: A Case Report." *Transl. Pediatr.* 9, no. 2 (2020): 180.
- National Center for Biotechnology Information, [VCV000136948.9]. "Clinvar." <https://www.ncbi.nlm.nih.gov/clinvar/variation/VCV000136948.9> (
- [VCV000707217.7], National Center for Biotechnology Information. <https://www.ncbi.nlm.nih.gov/clinvar/variation/VCV000707217.7> (
- [VCV000129948.9], National Center for Biotechnology Information. "National Center for Biotechnology Information. [Vcv000129948.9]." ClinVar, <https://www.ncbi.nlm.nih.gov/clinvar/variation/VCV000129948.9> (
- Kanthi, Anil, Malavika Hebbar, Stephanie L Bielas, Katta M Girisha, and Anju Shukla. "Bi-Allelic C. 181\_183deltgt in Btb Domain of Khlh7 Is Associated with Overlapping Phenotypes of Crisponi/Ciss1-Like and Bohring-Opitz Like Syndrome." *Eur. J. Med. Genet.* 62, no. 6 (2019): 103528.
- [VCV000216489.13], National Center for Biotechnology Information. <https://www.ncbi.nlm.nih.gov/clinvar/variation/VCV000216489.13> (
- National Center for Biotechnology Information, [VCV000258032.9]. "National Center for Biotechnology Information,[Vcv000258032.9]." <https://www.ncbi.nlm.nih.gov/clinvar/variation/VCV000258032.9> (
- [VCV000010738.32], National Center for Biotechnology Information. "National Center for Biotechnology Information. [Vcv000010738.32]." ClinVar, <https://www.ncbi.nlm.nih.gov/clinvar/variation/VCV000010738.32> (
